# Supplementary material for: Rapamycin directly activates lysosomal mucolipin TRP channels independent of mTOR
Source: PubMed Central journal article supplement (PMC6528971; doi:10.1371/journal.pbio.3000252), 2019-05-21

**A**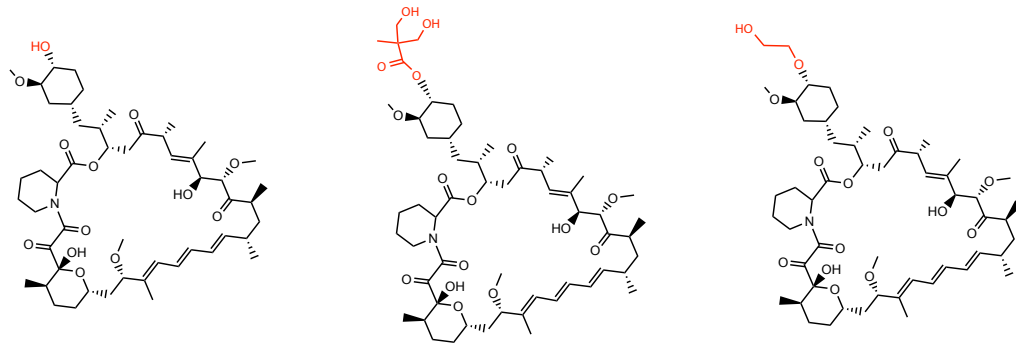

Rapamycin (Sirolimus)

Temsirolimus

Everolimus

**B**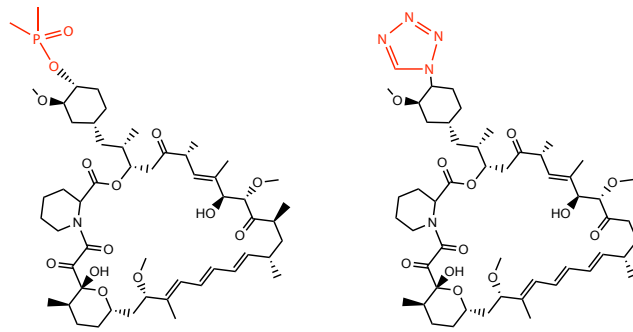

Deforolimus

Zotarolimus

**C**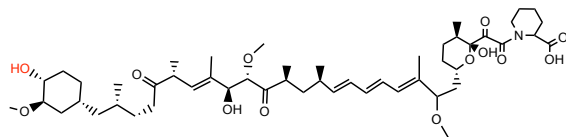

Seco rapamycin

**D**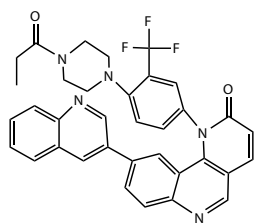

Torin-1

**E**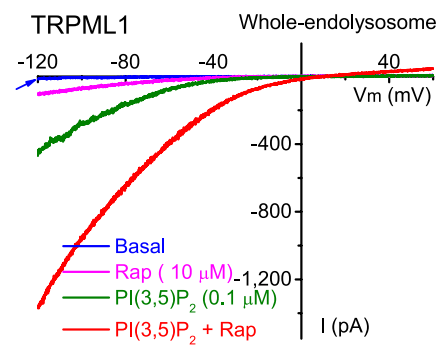

Supplement: pbio.3000252.s001.pdf [file pbio.3000252.s001.pdf]
