# Supplementary material for: Rapamycin directly activates lysosomal mucolipin TRP channels independent of mTOR
Source: PubMed Central journal article supplement (PMC6528971; doi:10.1371/journal.pbio.3000252), 2019-05-21

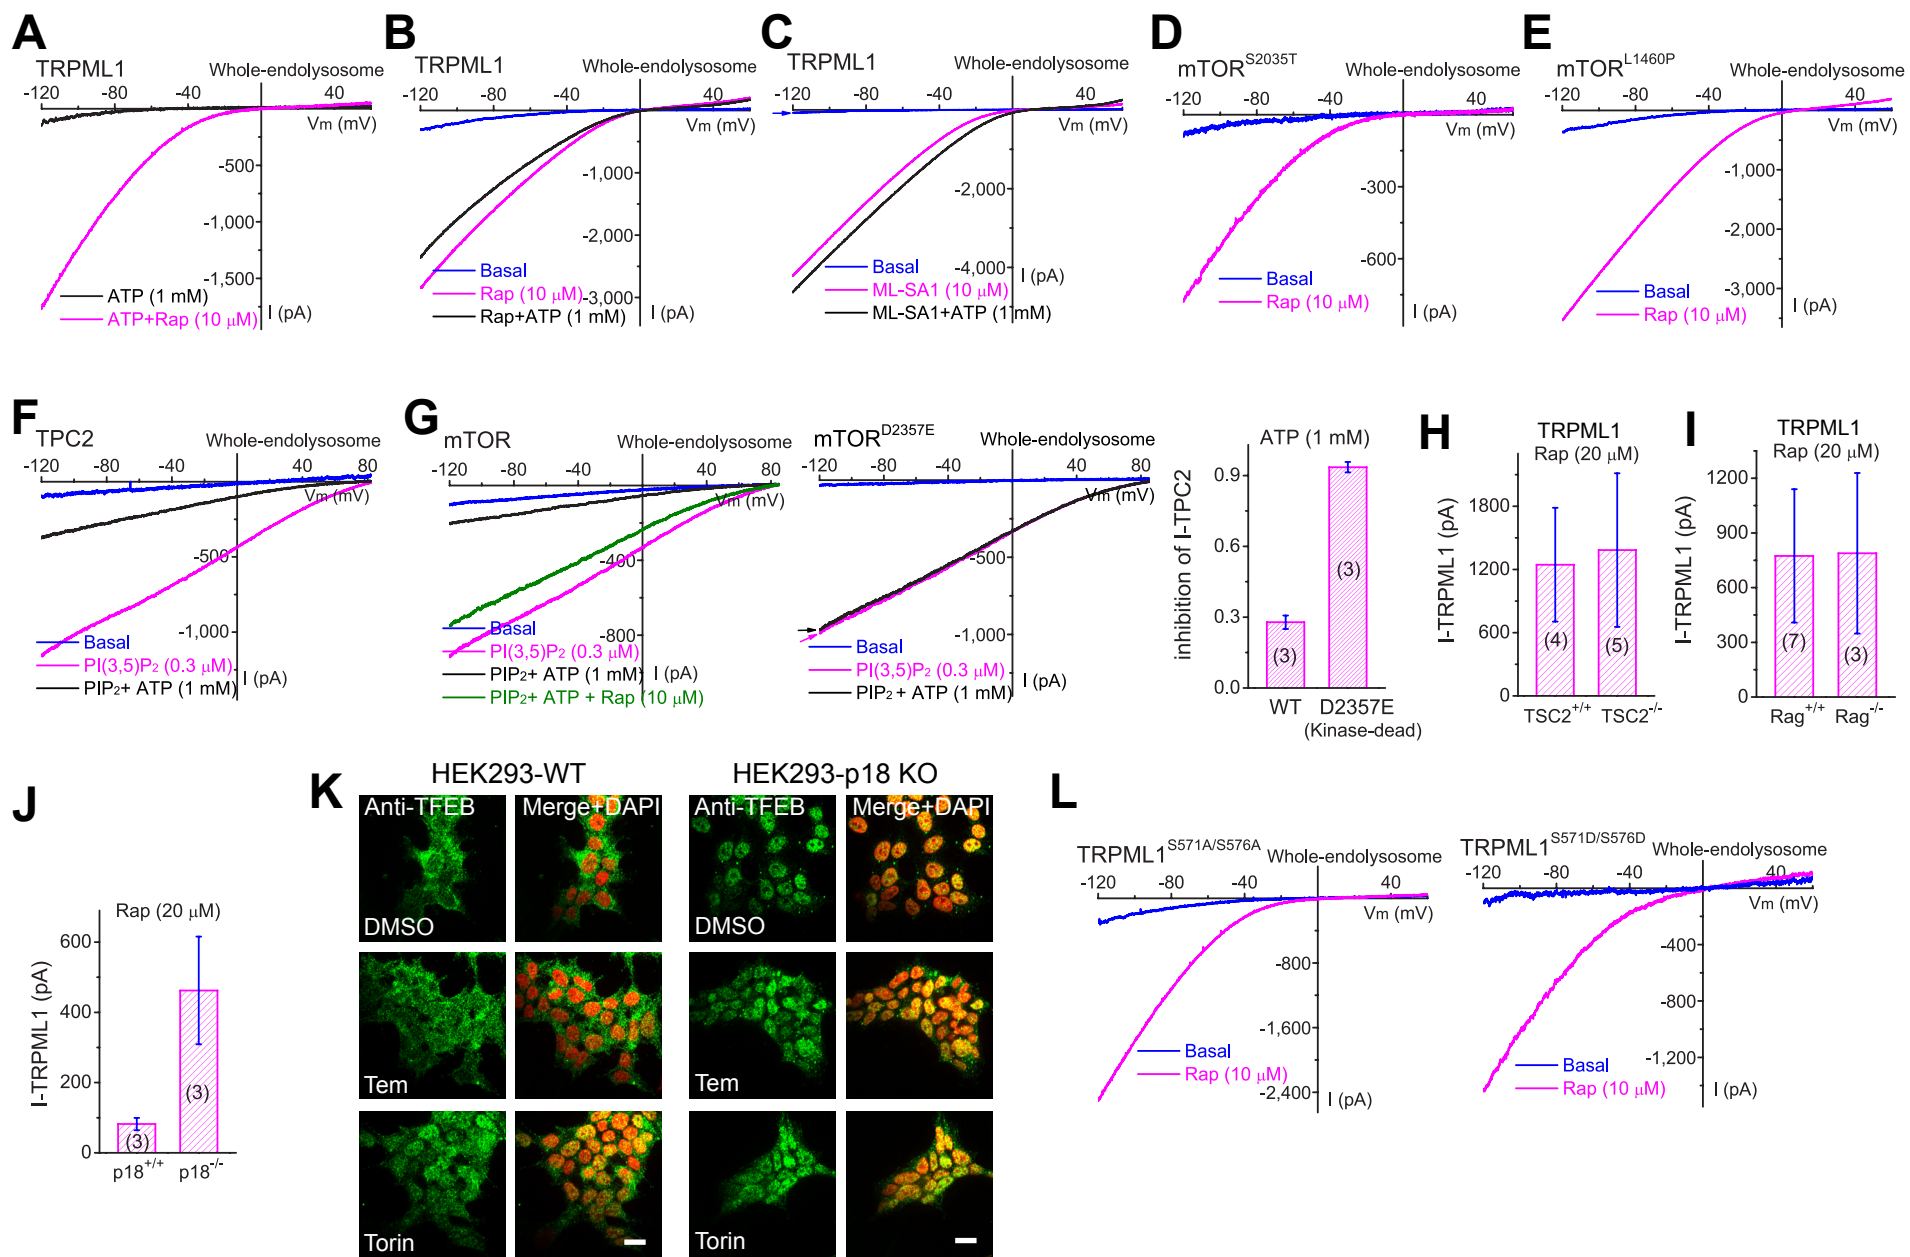

Supplement: pbio.3000252.s002.pdf [file pbio.3000252.s002.pdf]
